# Supplementary material for: H2S biotreatment with sulfide-oxidizing heterotrophic bacteria
Source: PubMed Central journal article supplement (PMC6245092; doi:10.1007/s10532-018-9849-6), 2018-08-23
Supplement: 10532_2018_9849_MOESM1_ESM.pdf [file 10532_2018_9849_MOESM1_ESM.pdf]

Supplementary Material for *Biodegradation*

## **H<sub>2</sub>S biotreatment with Heterotrophic Sulfide-Oxidizing Bacteria**

Ningke Hou<sup>1</sup>, Yongzhen Xia<sup>1</sup>, Xia Wang<sup>1</sup>, Huaiwei Liu<sup>1</sup>, Honglei Liu<sup>1,\*</sup>, and Luying Xun<sup>1,2,\*</sup>

<sup>1</sup> *State Key Laboratory of Microbial Technology, Shandong University, Jinan, 250100, P. R. China.*

<sup>2</sup> *School of Molecular Biosciences, Washington State University, Pullman, WA 99164-7520, USA.*

### **\*For correspondence:**

Honglei Liu: Email [lhl@sdu.edu.cn](mailto:lhl@sdu.edu.cn); Tel. + 86 159-6664-2788

Luying Xun: Email [luying\\_xun@vetmed.wsu.edu](mailto:luying_xun@vetmed.wsu.edu); Tel. +1 509-335-2787; Fax +1 (509) 335 4159.

### **Contents:**

**Figure S1.** The heat-inactive cells in FIG 1b did not oxidize sulfide.

**Figure S2.** The end-products of sulfide oxidation by five bacteria after 6-hours reaction

**Figure S3.** Magnetic beads without cells oxidize sulfide

**Table S1.** Tested heterotrophic bacteria and SQR and PDO accession numbers

**Table S2.** Distribution of TsdA in different bacterial phyla

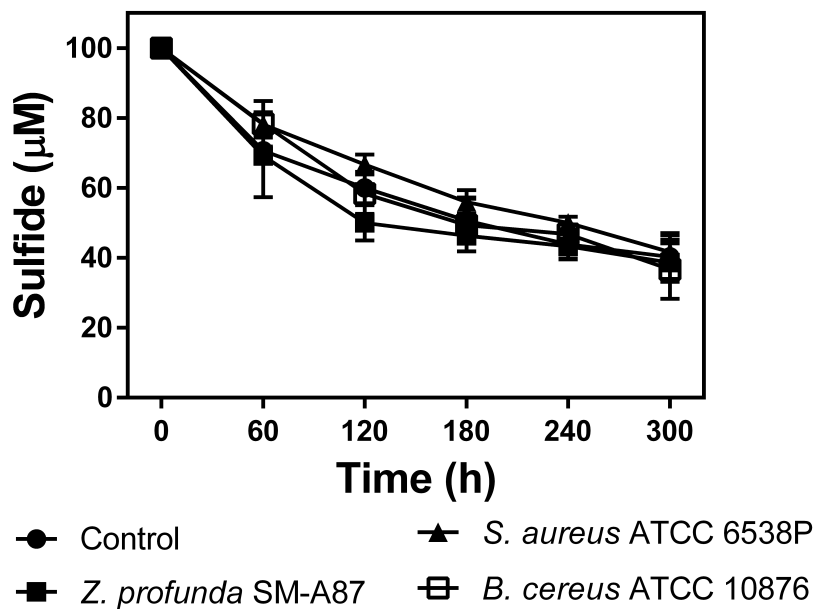

**Fig. S1. The heat-inactive cells in FIG 1b did not oxidize sulfide.** Cells were cultured, harvested, wash and re-suspended in the same way with FIG. 1. They were then heated in boiling water 30 minutes. NaHS was added to 100 μM to initiate the reaction. Averages ( $n \geq 3$ ) with standard deviations (error bar) were shown.

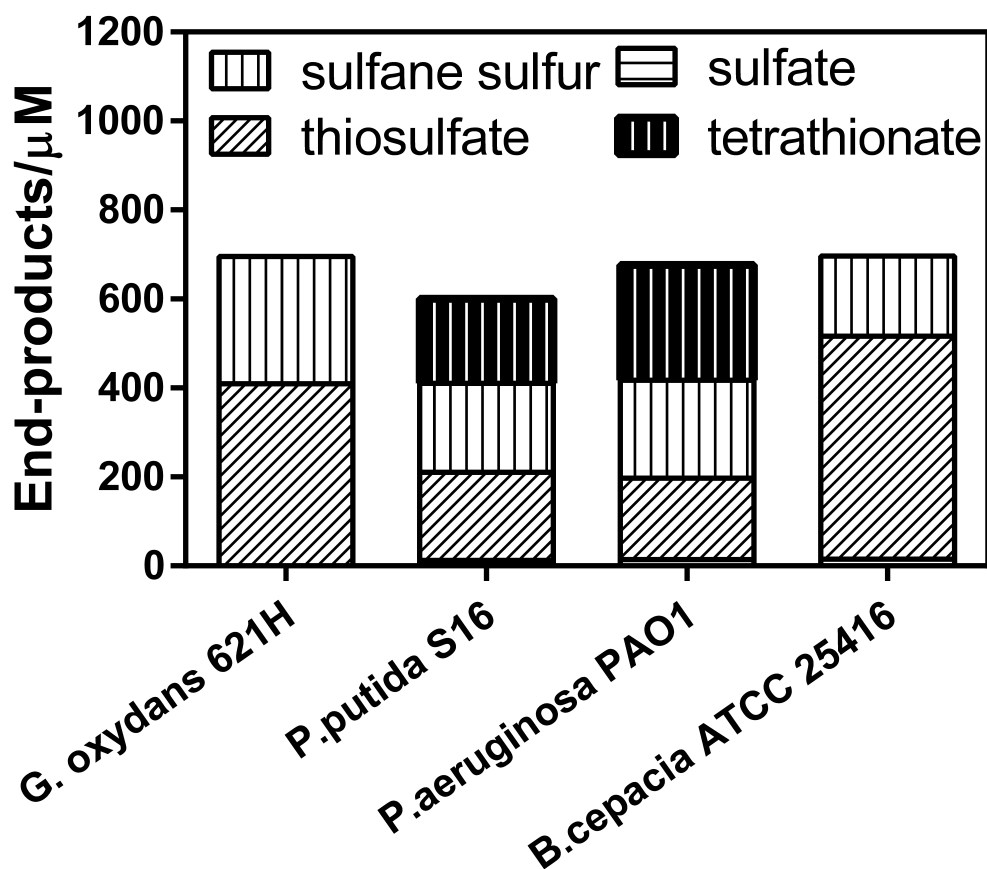

**Fig. S2. The end-products of sulfide oxidation by five bacteria after 6-hours reaction.** The experiments were done as described in the Figure 1 legend. Thiosulfate contains two sulfur atoms and tetrathionate contains four sulfur atoms, theirs' concentration was adjusted. Sulfane sulfur, zero valence sulfur.

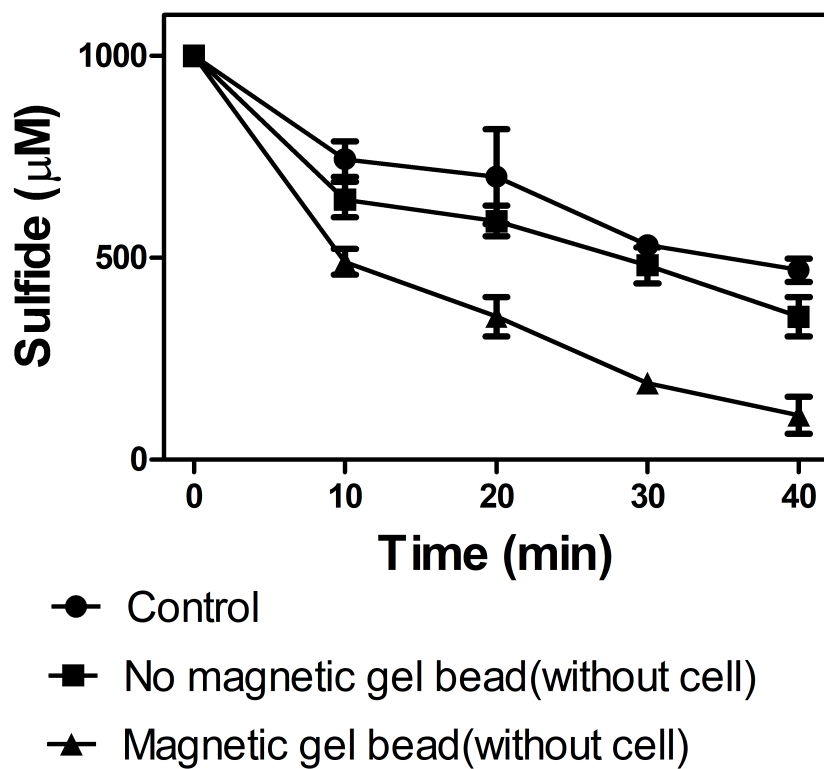

**Fig. S3. Gel beads coated  $\text{Fe}_3\text{O}_4$  nanoparticles without cells oxidize sulfide.** The experiments were carried out in 50-ml centrifuge tube containing 10 ml of HEPES buffer (pH=7.4) at  $30^\circ\text{C}$  on a reciprocal shaker at 180 r.p.m.. Averages ( $n \geq 3$ ) with standard deviations (error bar) were shown.

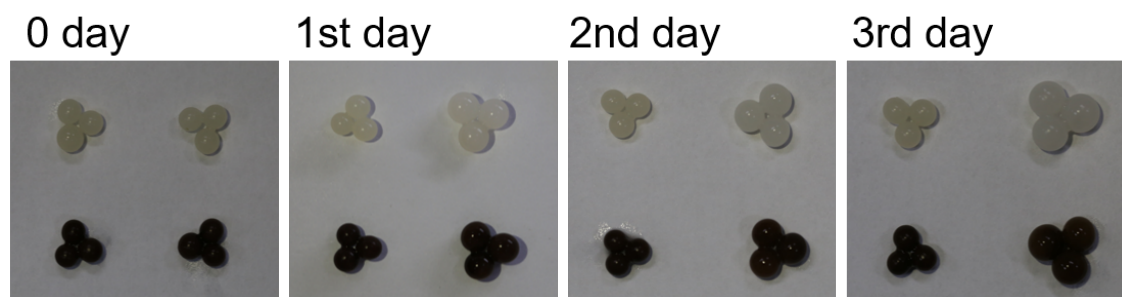

**Fig. S4. The change of diameters of beads with immobilized *G. oxydans* 621H cells during culturing in water or MM.** The cells were immobilized in alginate gel beads with (black) or without (white)  $\text{Fe}_3\text{O}_4$  nanoparticles. The experiments were carried out in 50-ml centrifuge tube containing 10 ml of distilled water or MM at 30°C on a reciprocal shaker at 180 r.p.m. On the left is the immobilized-cell beads incubated in distilled water; on the right is the immobilized-cell beads incubated in MM with glucose.

**Table S1.** Tested heterotrophic bacteria and SQR and PDO accession numbers

| Strains                        | SQR accession No. | PDO accession No. |
|--------------------------------|-------------------|-------------------|
|                                | WP_011252149.1    |                   |
| <i>G. oxydans</i> 621H         | WP_011252513.1    | WP_011252150.1    |
| <i>P. putida</i> S16           | WP_013970253.1    | WP_013970252.1    |
|                                | NP_251256.1       |                   |
| <i>P. aeruginosa</i> PAO1      | NP_251035.1       | NP_251605.1       |
|                                |                   | WP_027790374.1    |
| <i>B. cepacia</i> ATCC 25416   | WP_027787303.1    | WP_027787304.1    |
| <i>B. cereus</i> ATCC10876     | WP_000857315.1    | WP_000925319.1    |
| <i>Z. profunda</i> SM-A87      | WP_009779527.1    | WP_009779529.1    |
| <i>S. aureus</i> ATCC 6538P    | WP_001033018.1    | WP_000465474.1    |
|                                | WP_033641274.1    |                   |
| <i>S. marcescens</i> ATCC13880 | WP_033640364.1    | WP_033640361.1    |
| <i>E. coli</i> BL21            | None              | None              |

**Table S2.** Distribution of TsdA in different bacterial phyla.

|                       | TsdA counts |
|-----------------------|-------------|
| Betaproteobacteria    | 553         |
| Gammaproteobacteria   | 294         |
| Alphaproteobacteria   | 115         |
| Epsilonproteobacteria | 91          |
| Bacilli               | 11          |
| Synechococcales       | 9           |
| Flavobacteriia        | 8           |
| Sphingobacteriia      | 7           |
| Deltaproteobacteria   | 6           |
| Nitrospirales         | 4           |
| Acidobacteriales      | 3           |
| Parachlamydiales      | 2           |
| Aquificales           | 2           |
| Chitinophagia         | 2           |
| Deinococci            | 2           |
| Gemmatimonadales      | 2           |
| Cytophagia            | 1           |
